# Supplementary material for: Constraint of Base Pairing on HDV Genome Evolution
Source: MDPI journal article supplement (doi:10.3390/v13122350), 2021-11-23
Supplement: s1 [file s1]

# Supplementary Data S4

## Constraint of Base-Pairing on HDV Genome Evolution

by Nagata, S., Kiyohara, R., and Toh, H.

### Summary of Evolutionary Distances

The minimum, median, mean and maximum of the five evolutionary distances are shown for each comparison.

#### within Genotype I

|                  | min                  | median               | mean                 | max                  |
|------------------|----------------------|----------------------|----------------------|----------------------|
| $ed_{bp}(x, y)$  | 0.0                  | $3.7 \times 10^{-2}$ | $3.8 \times 10^{-2}$ | $1.4 \times 10^{-1}$ |
| $ed_{nbp}(x, y)$ | $9.8 \times 10^{-3}$ | $7.8 \times 10^{-2}$ | $8.2 \times 10^{-2}$ | $2.6 \times 10^{-1}$ |
| $ed(x, y)$       | $5.0 \times 10^{-3}$ | $6.3 \times 10^{-2}$ | $6.5 \times 10^{-2}$ | $1.5 \times 10^{-1}$ |
| $K_S^c(x, y)$    | $1.0 \times 10^{-2}$ | $2.3 \times 10^{-1}$ | $2.4 \times 10^{-1}$ | $6.5 \times 10^{-1}$ |
| $K_a^c(x, y)$    | 0.0                  | $7.0 \times 10^{-2}$ | $7.3 \times 10^{-2}$ | $1.9 \times 10^{-1}$ |

#### within Genotype II

|                  | min                  | median               | mean                 | max                  |
|------------------|----------------------|----------------------|----------------------|----------------------|
| $ed_{bp}(x, y)$  | 0.0                  | $9.4 \times 10^{-2}$ | $9.0 \times 10^{-2}$ | $2.1 \times 10^{-1}$ |
| $ed_{nbp}(x, y)$ | $9.5 \times 10^{-3}$ | $1.2 \times 10^{-1}$ | $1.2 \times 10^{-1}$ | $3.2 \times 10^{-1}$ |
| $ed(x, y)$       | $2.5 \times 10^{-3}$ | $1.3 \times 10^{-1}$ | $1.2 \times 10^{-1}$ | $2.8 \times 10^{-1}$ |
| $K_S^c(x, y)$    | $1.0 \times 10^{-2}$ | $2.5 \times 10^{-1}$ | $3.0 \times 10^{-1}$ | $7.2 \times 10^{-1}$ |
| $K_a^c(x, y)$    | 0.0                  | $8.0 \times 10^{-2}$ | $1.1 \times 10^{-1}$ | $2.4 \times 10^{-1}$ |

#### within Genotype III

|                  | min                  | median               | mean                 | max                  |
|------------------|----------------------|----------------------|----------------------|----------------------|
| $ed_{bp}(x, y)$  | $7.5 \times 10^{-3}$ | $3.2 \times 10^{-2}$ | $3.0 \times 10^{-2}$ | $4.8 \times 10^{-2}$ |
| $ed_{nbp}(x, y)$ | $3.4 \times 10^{-2}$ | $8.7 \times 10^{-2}$ | $8.1 \times 10^{-2}$ | $1.2 \times 10^{-1}$ |
| $ed(x, y)$       | $3.1 \times 10^{-2}$ | $6.4 \times 10^{-2}$ | $5.8 \times 10^{-2}$ | $7.6 \times 10^{-2}$ |
| $K_S^c(x, y)$    | $3.0 \times 10^{-2}$ | $5.0 \times 10^{-2}$ | $7.4 \times 10^{-2}$ | $1.3 \times 10^{-1}$ |
| $K_a^c(x, y)$    | $3.0 \times 10^{-2}$ | $5.0 \times 10^{-2}$ | $5.2 \times 10^{-2}$ | $9.0 \times 10^{-2}$ |

between Genotypes I and II

|                  | min                  | median               | mean                 | max                  |
|------------------|----------------------|----------------------|----------------------|----------------------|
| $ed_{bp}(x, y)$  | $1.3 \times 10^{-2}$ | $1.3 \times 10^{-1}$ | $1.2 \times 10^{-1}$ | $2.3 \times 10^{-1}$ |
| $ed_{nbp}(x, y)$ | $4.3 \times 10^{-2}$ | $1.7 \times 10^{-1}$ | $1.7 \times 10^{-1}$ | $3.5 \times 10^{-1}$ |
| $ed(x, y)$       | $7.8 \times 10^{-2}$ | $1.7 \times 10^{-1}$ | $1.7 \times 10^{-1}$ | $2.9 \times 10^{-1}$ |
| $K_s^c(x, y)$    | $3.9 \times 10^{-1}$ | $6.2 \times 10^{-1}$ | $6.2 \times 10^{-1}$ | 1.0                  |
| $K_a^c(x, y)$    | $1.4 \times 10^{-1}$ | $1.9 \times 10^{-1}$ | $1.9 \times 10^{-1}$ | $3.6 \times 10^{-1}$ |

between Genotypes I and III

|                  | min                  | median               | mean                 | max                  |
|------------------|----------------------|----------------------|----------------------|----------------------|
| $ed_{bp}(x, y)$  | $2.0 \times 10^{-1}$ | $2.5 \times 10^{-1}$ | $2.5 \times 10^{-1}$ | $3.1 \times 10^{-1}$ |
| $ed_{nbp}(x, y)$ | $2.5 \times 10^{-1}$ | $4.2 \times 10^{-1}$ | $4.2 \times 10^{-1}$ | $6.6 \times 10^{-1}$ |
| $ed(x, y)$       | $2.9 \times 10^{-1}$ | $3.5 \times 10^{-1}$ | $3.5 \times 10^{-1}$ | $4.2 \times 10^{-1}$ |
| $K_s^c(x, y)$    | $7.3 \times 10^{-1}$ | $9.8 \times 10^{-1}$ | $9.8 \times 10^{-1}$ | 1.3                  |
| $K_a^c(x, y)$    | $2.5 \times 10^{-1}$ | $2.8 \times 10^{-1}$ | $2.9 \times 10^{-1}$ | $3.5 \times 10^{-1}$ |

between Genotypes II and III

|                  | min                  | median               | mean                 | max                  |
|------------------|----------------------|----------------------|----------------------|----------------------|
| $ed_{bp}(x, y)$  | $1.7 \times 10^{-1}$ | $2.3 \times 10^{-1}$ | $2.3 \times 10^{-1}$ | $3.1 \times 10^{-1}$ |
| $ed_{nbp}(x, y)$ | $2.3 \times 10^{-1}$ | $3.6 \times 10^{-1}$ | $3.7 \times 10^{-1}$ | $5.6 \times 10^{-1}$ |
| $ed(x, y)$       | $2.7 \times 10^{-1}$ | $3.2 \times 10^{-1}$ | $3.2 \times 10^{-1}$ | $3.9 \times 10^{-1}$ |
| $K_s^c(x, y)$    | $6.1 \times 10^{-1}$ | $7.3 \times 10^{-1}$ | $7.3 \times 10^{-1}$ | $9.0 \times 10^{-1}$ |
| $K_a^c(x, y)$    | $2.3 \times 10^{-1}$ | $2.8 \times 10^{-1}$ | $2.8 \times 10^{-1}$ | $3.4 \times 10^{-1}$ |
